---

# Learning Complex Representations from Spatial Phase Statistics of Natural Scenes

---

**HaDi MaBouDi** <sup>\*†</sup>

School of Cognitive Sciences  
Institute for Research in Fundamental Sciences (IPM)  
Tehran, Iran  
h.d.maboudi@qmul.ac.uk

**Hideaki Shimazaki** <sup>\*</sup>

RIKEN Brain Science Institute  
Wako, Saitama, Japan  
shimazaki@brain.riken.jp

**Hamid Soltanian-Zadeh** <sup>‡</sup>

School of Cognitive Sciences  
Institute for Research in Fundamental Sciences (IPM)  
Tehran, Iran  
hamids@rad.hfh.edu

**Shun-ichi Amari**

RIKEN Brain Science Institute  
Wako, Saitama, Japan  
amari@brain.riken.jp

## Abstract

1 Natural scenes contain higher-order statistical structures that can be encoded in their  
2 spatial phase information. Nevertheless, little progress has been made in modeling  
3 phase information of images in order to understand efficient representation of  
4 image phases in the brain. Based on recent findings of spatial phase structure in  
5 natural scenes, we introduce a generative model of the phase information in the  
6 visual systems according to the efficient coding hypothesis. In this model, we  
7 assume independent priors for the amplitude and phase of the coefficients, and  
8 model the phase using a non-uniform distribution, which extends existing models  
9 of independent component analysis for complex-valued signals. The parameters of  
10 the proposed model are then estimated under the maximum-likelihood principle.  
11 Using simulated data, we show that the proposed model outperforms conventional  
12 models with a uniform phase prior in blind source separation of complex-valued  
13 signals. We then apply the proposed model to natural scenes in the Fourier domain.  
14 The learning yields nonlinear features specified by a pair of similar Gabor-like  
15 filters in quadratic phase structure. These features predict properties of phase  
16 sensitive complex cells in the visual cortex, and indicate that the phase sensitive  
17 complex cells are essential for removing redundancy in natural scenes.

## 18 1 Introduction

19 One of the successful guiding principles to understand visual systems in the brain is the efficient  
20 coding hypothesis [3]. According to this hypothesis, organizations of a visual system are adapted  
21 to regularities in natural scenes that an animal encounters. The efficient coding hypothesis has  
22 successfully guided us to construct physiologically plausible statistical models of neurons in early  
23 visual cortices. However, most of the previous models extracted information contained only in  
24 amplitudes of an image in the Fourier domain, and were blind to its phase structure. Contrary to the

---

\*Equal contribution

†Current affiliation: School of Biological and Chemical sciences, Queen Mary University of London, E1 4NS, London, UK.

‡Other affiliations: School of Electrical and Computer Engineering, University of Tehran, Iran; Department of Radiology, Henry Ford Health System, Detroit, MI, United States.

25 assumption of the previous models, it is well known that the phase of an image contains significantly  
 26 more perceptual information than the amplitude of an image [24]. Perceptually salient features  
 27 such as edges and bars are encoded in the ventral visual cortex based on their phase congruency  
 28 [2, 5, 7, 15]. It has also been shown that both simple and complex cells in macaque V1 are sensitive  
 29 to the phase images [9, 16, 20, 28]. Nevertheless, constructing models of a visual system that utilizes  
 30 the characteristic phase information in the natural scenes remains to be a challenging problem.

31 The classical linear generative models represent the natural images by linearly combining features  
 32 (i.e., receptive fields), and by weighting them using different coefficients [22, 4]. The coefficients  
 33 of the features (i.e., responses of the receptive fields) are learned from natural images so that they  
 34 become as independent as possible, according to the efficient coding hypothesis. Nevertheless it  
 35 is known that their dependency cannot be completely removed. It was pointed out that the residual  
 36 dependency in the responses of the receptive fields is conveniently described by using scalar and  
 37 circular components [30, 21, 19]. This suggests to use complex representation (a pair of real and  
 38 imaginary features) of the natural images [21, 8, 17]. A successful complex representation model may  
 39 explain why nearby simple cells in the primary visual cortex are phase quadratic [26, 13], and support  
 40 psychophysical studies which suggested image phases may be detected by combining responses of  
 41 simple cells possessing two odd and even symmetric receptive fields [26].

42 In this study, we present a linear generative model of complex representation for natural images using  
 43 a superposition of complex features (a pair of features). While we consider independent priors for the  
 44 amplitude and phase of the coefficients, our attention is particularly paid to the phase distribution.  
 45 MaBouDi et al. previously demonstrated that local phases of natural scenes detected by Gabor filters  
 46 are characterized by not only uniform but also non-uniform phase distributions [19]. Based on this  
 47 knowledge, we model the phase distribution using a mixture of von Mises distributions, and provide  
 48 inference algorithms under the maximum likelihood principle. We then demonstrate the utility and  
 49 neurophysiological implications of this approach by both blind source separation of simulated data  
 50 and analysis of natural scenes.

## 51 2 Complex-valued independent component analysis

52 Let  $X^{\text{obs}} = (X^1, X^2, \dots, X^T)$  be a collection of a complex-valued matrix that is a Fourier transform  
 53 of image patches with size  $N$  pixels. These  $T$  patches were selected randomly from natural scenes. If  
 54 we whiten the complex-valued data, we can assume that the samples,  $X^t (t = 1, \dots, T)$ , are mutually  
 55 uncorrelated with zero mean.

56 We consider the following complex-valued generative model for these observations. In this model, a  
 57 complex domain of natural patches,  $X$ , is generated from a superposition of unknown  $N$  complex  
 58 features,  $A_i (\in C^{N \times 1})$ , namely  $X = \sum_{i=1}^N s_i A_i$ . Here  $s_i$  is a complex coefficients given as  
 59  $s_i = s_i^R + j s_i^I$  ( $j = \sqrt{-1}$ ), where  $s_i^R$  and  $s_i^I$  are real and imaginary components of the coefficient.  
 60 This equation can be summarized as  $X = AS$ , where  $A = [A_1, A_2, \dots, A_N]$  is a mixing invertible  
 61 matrix and  $S = [s_1, s_2, \dots, s_N]^T$  is a vector of complex coefficients. We assume that the samples  
 62 are generated by the complex linear model using the complex coefficients that are sampled from  
 63 an independent distributions of  $S$ , namely  $p_s(S) = \prod_{i=1}^N p_{s_i}(s_i)$ . This means, for each  $X^t$ , the  
 64 coefficients  $s^t$  are chosen independently, although the theory is applicable to the case in which  $s^t$  and  
 65  $s^{t'}$  are dependent. Using the de-mixing matrix  $W = A^{-1}$  (i.e.,  $S = WX$ ), the Jacobian of the above  
 66 linear transformation is given as  $\det(\overline{W})$ , where  $\overline{W} = [W^R, -W^I; W^I, W^R]$  with  $W^R$  and  
 67  $W^I$  being the real and imaginary component of  $W$ , respectively. Thus given  $p_s(S)$ , the probability  
 68 density function of  $X$  is obtained as

$$p_X(X) = \det(\overline{W}) \prod_{i=1}^N p_{s_i}(s_i). \quad (1)$$

69 The complex independent component analysis (cICA) aims to infer the transform matrix  $A$  (or  $W$ )  
 70 and source signals  $S$  under the assumption of their independence.

71 In this study, we propose to model each complex coefficient by polar coordinates, and impose  
 72 independence between the amplitude and phase components. Namely, we rewrite the complex  
 73 coefficients as  $s_i = r_i e^{j\varphi_i}$ , where  $r_i = |s_i|$  and  $\varphi_i = \arctan \frac{s_i^I}{s_i^R}$  are the amplitude and phase

74 components of  $s_i$ , respectively. Then the probability density function of  $s_i$  is

$$p_{s_i}(s_i) = \frac{p(r_i, \varphi_i)}{r_i} = \frac{1}{r_i} p_{r_i}(r_i) p_{\varphi_i}(\varphi_i). \quad (2)$$

75 Throughout this paper, we assume that the amplitude distribution  $p_{r_i}(r_i)$  follows the gamma distribu-  
76 tion with the shape parameter being 2,

$$p_{r_i}(r_i; \beta_i) = \beta_i^2 r_i e^{-\beta_i r_i}, \quad (3)$$

77 where  $\beta_i > 0$  is a scale parameter. This distribution resembles the amplitude distribution obtained  
78 from responses of complex Gabor filters to natural scenes [19], and imposes sparseness on the  
79 complex coefficients. We let the shape parameter be 2 because we found that the optimization  
80 algorithm to estimate the complex features under the maximum likelihood principle results in the  
81 algorithms proposed by previous studies (see below). While the previous studies utilized only  
82 amplitude information (a flat phase prior), our approach based on the maximum likelihood principle  
83 allows us to use different types of phase priors, and compare their performance. In the following  
84 sections, we derive optimization algorithms by considering two types of prior knowledge on the  
85 distributions of the phase components of the complex coefficients.

86 **Circular complex-valued ICA (c-cICA)** In this approach termed a circular cICA (c-cICA), we  
87 assume a uniform phase distribution,  $p_{\varphi_i}(\varphi_i) = 1/2\pi$ . The goal is to estimate the linear transforma-  
88 tion  $W$  such that the elements of the complex coefficient vector,  $S$ , are as independent as possible  
89 through an iterative optimization procedure. We estimate the parameters of the c-cICA model under  
90 the maximum likelihood principle. Given that the image patches are sampled independently, Eq. 1  
91 gives the log-likelihood function of the model parameters:

$$l(W, \beta; X^{\text{obs}}) = \sum_{t=1}^T \sum_{i=1}^N \log p_{s_i}(W_i X^t) + T \log \det \bar{W}, \quad (4)$$

92 where  $W_i$  is the  $i$ -th row of  $W$ . By considering the prior knowledge of amplitude, Eq. 2, and a  
93 uniform phase distribution, we have

$$l(W, \beta; X^{\text{obs}}) = \sum_{t=1}^T \sum_{i=1}^N [2 \log \beta_i - \beta_i r_i^t] - TN \log 2\pi + T \log \det \bar{W}. \quad (5)$$

94 Note that this log-likelihood function generalizes the contrast function used in the complex Fast  
95 ICA [6]. Moreover since this model assumes a uniform phase distribution for the complex random  
96 variables, it is applicable for separation of circular complex random variables [14]. The maximum  
97 likelihood estimates (MLEs) of the model can be obtained by gradient descent algorithms, using the  
98 following gradients:

$$\frac{\partial l(W, \beta)}{\partial \beta_i} = \sum_{t=1}^T \left( \frac{2}{\beta_i} - r_i^t \right), \quad (6)$$

$$\frac{\partial l(W, \beta)}{\partial W_{m,n}} = T(W^{-H})_{m,n} - \sum_{t=1}^T \frac{\beta_m x_n^t s_m^{t*}}{r_m^t}, \quad (7)$$

99 where the superscripts  $*$  and  $H$  denote the conjugate of complex coefficient,  $s_m$ , and Hermitian  
100 transpose of de-mixing matrix  $W$ , respectively. Note that  $r_i$  and  $s_m$ , are calculated from  $W$  and  $X$ .

101 **Modified circular complex-valued ICA (mc-cICA)** The c-cICA model does not use phase in-  
102 formation that may be contained in the image patches. However, it was previously reported that  
103 higher-order statistics of natural scene is additionally encoded in non-uniform bimodal phase dis-  
104 tributions [19]. In this section, we extend the complex ICA, and construct a model that utilizes the  
105 non-uniform phase distributions.

106 More specifically, we model the phase distribution by a mixture of uniform and von-Mises distribu-  
107 tions:

$$p_{\varphi_i}(\varphi_i; \kappa_i, \lambda) = \lambda \text{vM}(\varphi_i; \kappa_i, 0) + \lambda \text{vM}(\varphi_i; \kappa_i, \pi) + (1 - 2\lambda) \frac{1}{2\pi}. \quad (8)$$

108 Here  $vM(\varphi_i; \kappa_i, 0)$  is a von-Mises distribution for a circular variable  $\varphi_i$  with zero mean and a concen-  
 109 tration parameter  $\kappa_i$ . We assume the zero mean because the peak phase location is redundant when  
 110 the features are learned from the data. Further, given the observations of spatial phase distributions in  
 111 natural scenes [19], we consider symmetric bimodal phase distributions with two peaks separated  
 112 by  $\pi$ . For simplicity we further assume equal contributions from each component ( $\lambda = 1/3$ ). Then  
 113 the phase distribution that can cover a uniform and a spectrum of bimodal phase distributions is  
 114 simplified as

$$p_{\varphi_i}(\varphi_i; \kappa_i) = \frac{1}{3\pi I_0(\kappa_i)} \cosh(\kappa_i \cos \varphi_i) + \frac{1}{6\pi}, \quad (9)$$

115 where  $I_0(\cdot)$  is the Bessel function of order 0. This model is a modification of the previous circular  
 116 cICA. We call this new model the modified circular cICA (mc-cICA).

117 The log-likelihood function of the mc-cICA model is

$$l(\theta; X^{\text{obs}}) = \sum_{t=1}^T \sum_{i=1}^N [2 \log \beta_i - \beta_i r_i^t + \log \cosh(\kappa_i \cos \varphi_i^t) - \log 3\pi I_0(\kappa_i)] + T \log \det \bar{W}, \quad (10)$$

118 where  $\theta = (W, \{\beta_i, \kappa_i\}_{i=1}^N)$  is a vector of the model parameters.

119 The MLEs of the parameters in the proposed model are obtained by gradient descent algorithms using  
 120 Eq. 6 and the following gradients:

$$\frac{\partial l(\theta)}{\partial \kappa_i} = \sum_{t=1}^T \cos \varphi_i^t \tanh(\kappa_i \cos \varphi_i^t) - T \frac{I_1(\kappa_i)}{I_0(\kappa_i)}, \quad (11)$$

$$\frac{\partial l(\theta)}{\partial W_{m,n}} = T(W^{-H})_{m,n} - \sum_{t=1}^T \left[ \frac{\beta_m x_n^t s_m^{t*}}{2 r_m^t} + \frac{1}{2} j \kappa_m \sin \varphi_i^t \tanh(\kappa_m \cos \varphi_m^t) \frac{x_n^t s_m^{t*}}{r_m^t} \right], \quad (12)$$

121 where  $I_1(\cdot)$  is the Bessel function of order 1. For both c-cICA and mc-cICA, we use the conjugate  
 122 gradient method.

### 123 3 Results

124 **Performance comparison using simulated data** In this section, we evaluate efficiency of source  
 125 separation by variants of the cICAs, using simulated data. For this goal, we generated a data set  $X$  by  
 126 mixing 10 independent complex-valued source signals  $S$ , using a random invertible matrix  $A$ . We  
 127 considered two different types of the complex-valued source signals using the polar coordinates: In  
 128 one data set, phases were sampled from a uniform distribution; in the other data set, phases were  
 129 sampled from a bimodal distribution (Eq. 8). Amplitudes were sampled from Eq. 3 in both cases. In  
 130 total, we generated 20 data sets for each case. The mixing matrix and parameters of the probability  
 131 density function of sources were chosen randomly for each data set.

132 We then applied the various cICA models to estimate the de-mixing matrix  $W$ . We evaluated their  
 133 performance as follows. If the source signals are perfectly separated by these algorithms, the product  
 134 of the mixing matrix,  $A$ , and the estimated transformation  $\bar{W}$  must be close to a permutation of the  
 135 identity matrix. This matrix  $P = \bar{W}A$  is called a performance matrix. Examples of the performance  
 136 matrices  $P$  obtained from the c-cICA and mc-cICA models are shown in Fig. 1. The performance  
 137 matrix of the mc-cICA model is closer to the permutation of identity matrix than the performance  
 138 matrix of the c-cICA model, which indicates that the mc-cICA performs better in source separation.  
 139 The quality of separation is summarized by the Amari index [1] defined on this performance matrix  
 140 as

$$AI = \sum_{m=1}^N \left( \sum_{n=1}^N \frac{|P_{m,n}|}{\max_k |P_{m,k}|} - 1 \right) + \sum_{n=1}^N \left( \sum_{m=1}^N \frac{|P_{m,n}|}{\max_k |P_{k,n}|} - 1 \right), \quad (13)$$

141 where  $P_{m,n}$  is a (m,n)-element of  $P$ .

142 Using the Amari index, we compared the mc-cICA with c-cICA as well as the previously suggested  
 143 complex FastICA algorithm [6]. Figure 2 shows performance of the models for separating mixed  
 144 independent complex-valued signals. We computed mean and standard deviation of the Amari index  
 145 for 20 data sets composed of different sample sizes. Overall the performance of all 3 models increases

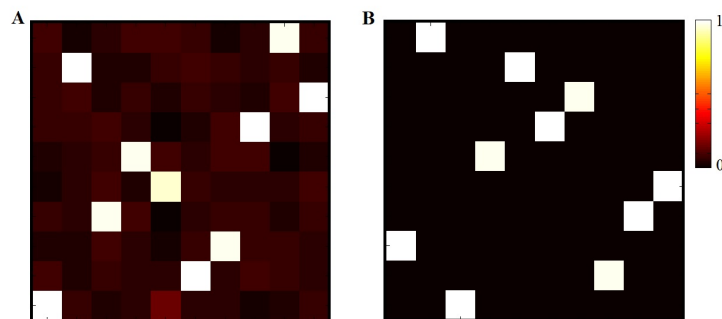

Figure 1: **Examples of performance matrices obtained from c-cICA and mc-cICA.** The performance matrix was computed as a product of a mixing matrix and a de-mixing matrix estimated by the two proposed algorithms (A: c-cICA, B: mc-cICA). The data were generated from a mixtures of 10 independent complex-valued signals, using a non-uniform phase distribution. The two performance matrices are normalized by the absolute maximum value in each column. This comparison shows that the mc-cICA performs better than the c-cICA.

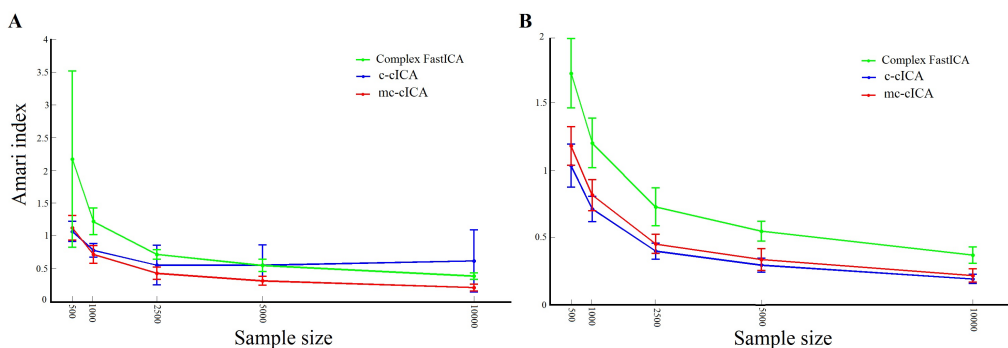

Figure 2: **Comparison of model's performance in complex-valued signal separation.** The Amari indexes of the models are plotted as a function of the sample size (a mean of 20 data sets  $\pm$  SD ). The data sets were constructed using a combination of a uniform and bimodal phase distributions (Left) or a uniform phase distribution (Right).

146 with the sample sizes. Figure 2A shows the performance of models when they are applied to mixed  
 147 complex signals generated by a combination of the bimodal and uniform phase distributions. Overall  
 148 the mc-cICA outperformed the c-cICA and the complex Fast ICA for these data sets, although the  
 149 performance of mc- and c-cICA were close in particular for small sample size. Figure 2B exhibits  
 150 performance of the models when they are applied to mixed complex signals generated by the uniform  
 151 phase distribution (i.e., circular complex variables). For these data sets, the c-cICA and mc-cICA  
 152 outperform the complex Fast ICA. Importantly, the performance of the mc-cICA approaches that  
 153 of c-cICA whose assumption coincides with the data, indicating that the mc-cICA can successfully  
 154 estimate the uniform phase distribution in the data.

155 **Application of the mc-cICA to natural scenes** In this section, we apply the mc-cICA model to  
 156 natural scenes, and then analyze the optimal parameters of complex features learned from the natural  
 157 scenes. We used the Hans van Hateren's repository of natural scenes [29] provided by Olshausen  
 158 and Field [23]. We randomly selected 100,000 image patches with size  $16 \times 16$  pixels from the  
 159 natural scenes. We then computed the Fourier transform of each patch, and obtained the complex  
 160 representation of natural scenes. After the DC components of each complex-valued patches were  
 161 subtracted, we performed the complex whitening algorithm on the data. Finally, we applied the  
 162 mc-cICA to the whitened natural patches to obtain the complex-valued features and source signals.



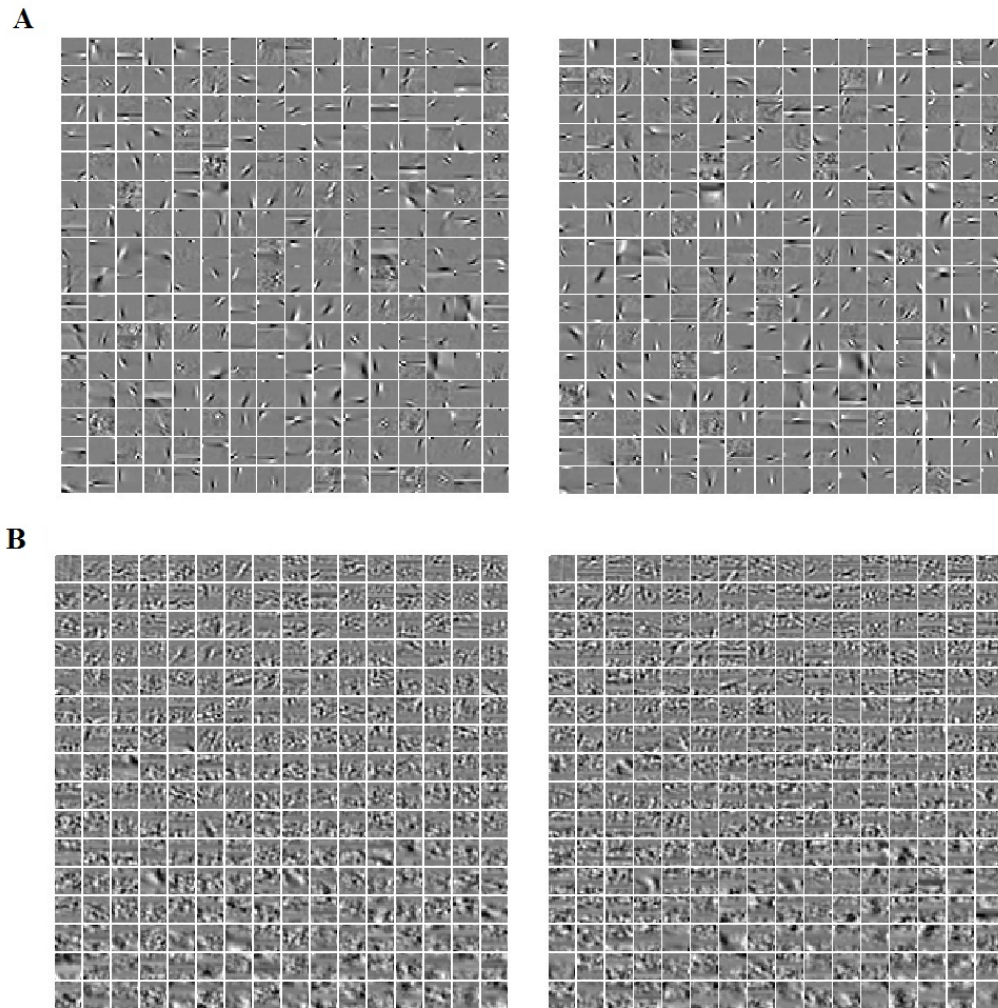

Figure 3: **Complex features learned from natural scenes.** The whole set of real (Left) and imaginary (Right) components of complex features obtained by the mc-cICA (panel A) and complex Fast ICA (panel B).

163 Figure 3A shows the features extracted from the natural scenes in the original domain, i.e., an inverse  
164 transformation of the obtained complex-valued features to a real domain by multiplying them by  
165 the de-whitened matrix and inverse Fourier transform matrix. As a comparison, we show in Fig. 3B  
166 features obtained from the complex Fast ICA applied to the same natural patches. By comparing the  
167 complex features obtained from the mc-cICA and complex Fast ICA (Figs.3A and 3B ), we conclude  
168 that the mc-cICA model provides the features that are more close to the receptive fields of neurons in  
169 early visual cortex than the complex FastICA model.

170 We further analyzed the learned complex features by comparing them with neurophysiological  
171 properties of V1 simple and complex cells. In order to quantify the learned features, we projected  
172 them to a space of parametric model of a simple cell receptive field: a two-dimensional Gabor  
173 function with five parameters that control location, frequency, phase and orientation of the filter. This  
174 artificial receptive field covers various selectivity of simple cells in the primary visual cortex [10, 25].  
175 We extracted these parameters by changing the set of parameters of the Gabor-like receptive field,  
176 and finding the one that maximizes an inner product of the complex features with it.

177 The distribution of extracted frequency bandwidths shown in Fig. 4A covered the spatial frequency  
178 bandwidth of simple cells from 0.4 to 2.6 octaves [25, 10]. The median value of the learned complex

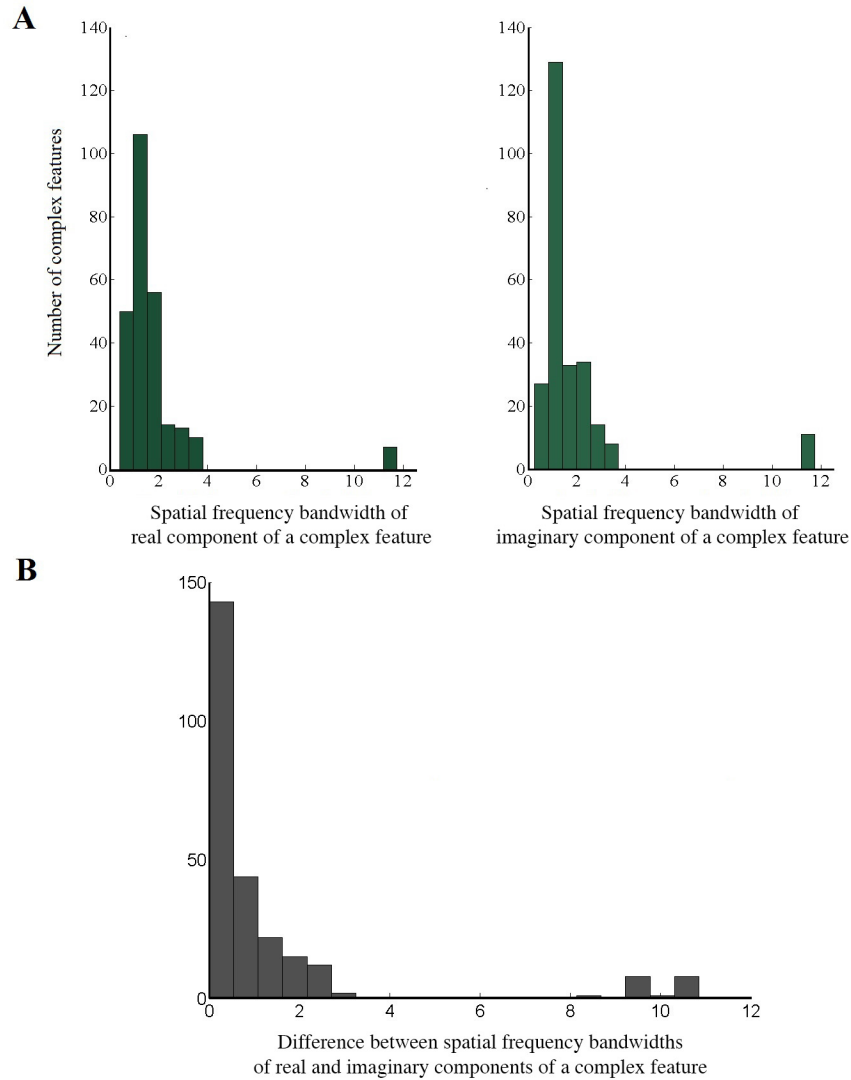

Figure 4: **Histogram of spatial frequency bandwidths.** (A) Histogram of extracted frequency bandwidths (octave) for real (Left) and imaginary (Right) components of learned complex features. A median for real and imaginary components is 1.318. (B) Histogram of difference between spatial frequency bandwidths of real and imaginary components. The real and imaginary components mostly exhibit the same frequency bandwidth.

179 features (1.318) was close to ~1.4 octaves that was reported as a median value of macaque V1 neurons  
180 [27]. A histogram of difference between the extracted spatial frequency bandwidths of the real and  
181 imaginary components of the complex features (Fig. 4B) indicates that they exhibit mostly the same  
182 structure.

183 Figure 5A displays a scatter plot of the spatial frequency bandwidth v.s. orientation bandwidth  
184 extracted from the real component of complex features. The orientation bandwidths were distributed  
185 uniformly irrespective of the spatial frequency bandwidths [12]. Further, the real and imaginary  
186 complex features were tuned to the same specific orientation bandwidth (Fig. 5B). Finally, the real  
187 and imaginary components of the complex features were orthogonal to each other (Fig. 5C).

188 In summary, the real and imaginary components of the complex features learned from natural  
189 scenes resembled the Gabor-like receptive fields observed in neurophysiological literature. The real  
190 and imaginary components of complex features exhibited the same structures in spatial frequency,

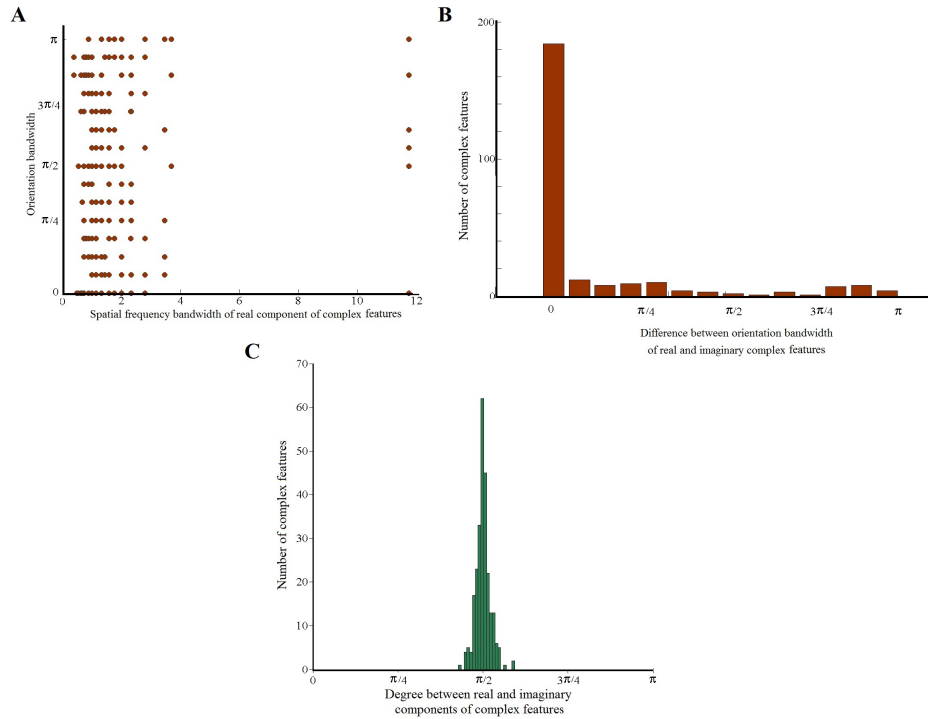

Figure 5: **Orientation bandwidths and orthogonality of learned complex features.** (A) Scatter plot of orientation bandwidth versus spatial frequency bandwidth of real components of complex features. (B) Histogram of differences between orientations of the real and imaginary components. (C) Orthogonality between the real and imaginary components of the complex features.

191 orientation and scale, but their phase are in quadrature (i.e., they are orthogonal), similarly to adjacent  
 192 simple cells in early visual cortex [26, 13]. These features emerged even though we did not impose  
 193 any assumption on their structure during training.

#### 194 4 Conclusion

195 In this study, we suggested a generative model for complex representation of natural scenes in  
 196 the visual cortex, which is applicable for separation of non-circular complex source signals. We  
 197 demonstrated that, in blind source separation of complex-valued signals, the proposed model out-  
 198 performs over and above the other methods that do not consider the phase information because the  
 199 proposed model adaptively infers the underlying phase distribution including the uniform phase.  
 200 Applied to natural scenes, we found that the components of learned complex feature better represent  
 201 characteristic of the simple-cell receptive fields, and that the pair of components explains observed  
 202 topographic relations between nearby simple cells. These results are consistent with proposals in  
 203 signal processing to use quadrature pairs of Gabor filters [11, 18]. Under efficient coding hypothesis,  
 204 these features suggest functions of phase sensitive complex cells in the redundancy reduction.

#### 205 References

- 206 [1] S.-i. Amari, A. Cichocki, H. H. Yang, et al. A new learning algorithm for blind signal separation. *Advances*  
 207 *in neural information processing systems*, pages 757–763, 1996.
- 208 [2] D. R. Badcock. How do we discriminate relative spatial phase? *Vision Research*, 24(12):1847–1857, 1984.
- 209 [3] H. B. Barlow. Possible principles underlying the transformations of sensory messages. 1961.
- 210 [4] A. J. Bell and T. J. Sejnowski. The “independent components” of natural scenes are edge filters. *Vision*  
 211 *research*, 37(23):3327–3338, 1997.



- 212 [5] P. J. Bennett and M. S. Banks. The effects of contrast, spatial scale, and orientation on foveal and peripheral  
213 phase discrimination. *Vision research*, 31(10):1759–1786, 1991.
- 214 [6] E. Bingham and A. Hyvärinen. A fast fixed-point algorithm for independent component analysis of  
215 complex valued signals. *International journal of neural systems*, 10(01):1–8, 2000.
- 216 [7] D. C. Burr, M. C. Morrone, and D. Spinelli. Evidence for edge and bar detectors in human vision. *Vision  
217 research*, 29(4):419–431, 1989.
- 218 [8] C. F. Cadieu and B. A. Olshausen. Learning intermediate-level representations of form and motion from  
219 natural movies. *Neural computation*, 24(4):827–866, 2012.
- 220 [9] N. A. Crowder, J. Van Kleef, B. Dreher, and M. R. Ibbotson. Complex cells increase their phase sensitivity  
221 at low contrasts and following adaptation. *Journal of neurophysiology*, 98(3):1155–1166, 2007.
- 222 [10] J. G. Daugman. Uncertainty relation for resolution in space, spatial frequency, and orientation optimized  
223 by two-dimensional visual cortical filters. *JOSA A*, 2(7):1160–1169, 1985.
- 224 [11] J. G. Daugman. Entropy reduction and decorrelation in visual coding by oriented neural receptive fields.  
225 *Biomedical Engineering, IEEE Transactions on*, 36(1):107–114, 1989.
- 226 [12] R. L. De Valois, E. W. Yund, and N. Hepler. The orientation and direction selectivity of cells in macaque  
227 visual cortex. *Vision research*, 22(5):531–544, 1982.
- 228 [13] G. C. DeAngelis, G. M. Ghose, I. Ohzawa, and R. D. Freeman. Functional micro-organization of primary  
229 visual cortex: receptive field analysis of nearby neurons. *The Journal of Neuroscience*, 19(10):4046–4064,  
230 1999.
- 231 [14] J. Eriksson, A.-M. Seppola, and V. Koivunen. Complex ica for circular and non-circular sources. In *Signal  
232 Processing Conference, 2005 13th European*, pages 1–4. IEEE, 2005.
- 233 [15] D. J. Field and J. Nachmias. Phase reversal discrimination. *Vision Research*, 24(4):333–340, 1984.
- 234 [16] M. Hietanen, S. Cloherty, J. Van Kleef, C. Wang, B. Dreher, and M. Ibbotson. Phase sensitivity of complex  
235 cells in primary visual cortex. *Neuroscience*, 237:19–28, 2013.
- 236 [17] V. Laparra, M. U. Gutmann, J. Malo, and A. Hyvärinen. Complex-valued independent component analysis  
237 of natural images. In *Artificial Neural Networks and Machine Learning–ICANN 2011*, pages 213–220.  
238 Springer, 2011.
- 239 [18] T. S. Lee. Image representation using 2d gabor wavelets. *Pattern Analysis and Machine Intelligence, IEEE  
240 Transactions on*, 18(10):959–971, 1996.
- 241 [19] H. MaBouDi, H. Shimazaki, S.-i. Amari, and H. Soltanian-Zadeh. Representation of higher-order statistical  
242 structures in natural scenes via spatial phase distributions. *Vision research*, 2015.
- 243 [20] F. Mechler, D. S. Reich, and J. D. Victor. Detection and discrimination of relative spatial phase by v1  
244 neurons. *The Journal of neuroscience*, 22(14):6129–6157, 2002.
- 245 [21] B. A. Olshausen, C. F. Cadieu, and D. K. Warland. Learning real and complex overcomplete representations  
246 from the statistics of natural images. In *SPIE Optical Engineering+ Applications*, pages 74460S–74460S.  
247 International Society for Optics and Photonics, 2009.
- 248 [22] B. A. Olshausen et al. Emergence of simple-cell receptive field properties by learning a sparse code for  
249 natural images. *Nature*, 381(6583):607–609, 1996.
- 250 [23] B. A. Olshausen and D. J. Field. Sparse coding with an overcomplete basis set: A strategy employed by  
251 v1? *Vision research*, 37(23):3311–3325, 1997.
- 252 [24] A. V. Oppenheim and J. S. Lim. The importance of phase in signals. *Proceedings of the IEEE*, 69(5):529–  
253 541, 1981.
- 254 [25] N. Petkov and P. Kruizinga. Computational models of visual neurons specialised in the detection of  
255 periodic and aperiodic oriented visual stimuli: bar and grating cells. *Biological cybernetics*, 76(2):83–96,  
256 1997.
- 257 [26] D. A. Pollen and S. F. Ronner. Phase relationships between adjacent simple cells in the visual cortex.  
258 *Science*, 212(4501):1409–1411, 1981.

- 259 [27] B. C. Skottun, R. L. De Valois, D. H. Grosof, J. A. Movshon, D. G. Albrecht, and A. Bonds. Classifying  
260 simple and complex cells on the basis of response modulation. *Vision research*, 31(7):1078–1086, 1991.
- 261 [28] J. Touryan, G. Felsen, and Y. Dan. Spatial structure of complex cell receptive fields measured with natural  
262 images. *Neuron*, 45(5):781–791, 2005.
- 263 [29] J. H. van Hateren and A. van der Schaaf. Independent component filters of natural images compared with  
264 simple cells in primary visual cortex. *Proceedings of the Royal Society of London B: Biological Sciences*,  
265 265(1394):359–366, 1998.
- 266 [30] B. Wegmann and C. Zetsche. Statistical dependence between orientation filter outputs used in a human-  
267 vision-based image code. In *Lausanne-DL tentative*, pages 909–923. International Society for Optics and  
268 Photonics, 1990.
